# Supplementary material
Source: PubMed Central journal article supplement (PMC2736090)

Lactation Protocol:

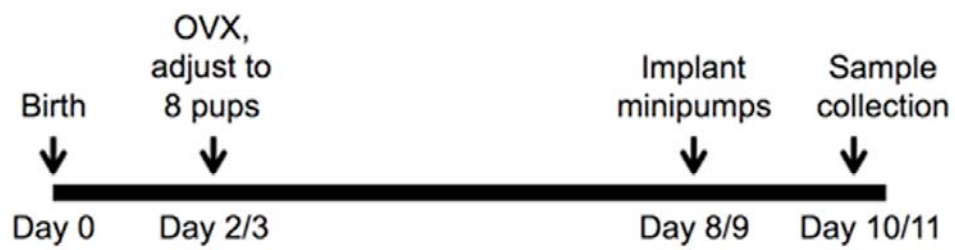

Virgin Control Protocol:

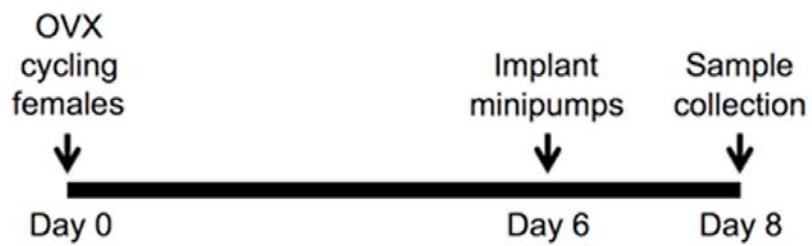

Supplement: en.2009-0190_1.pdf [file en.2009-0190_1.pdf]

Exp. 1: Insulin replacement

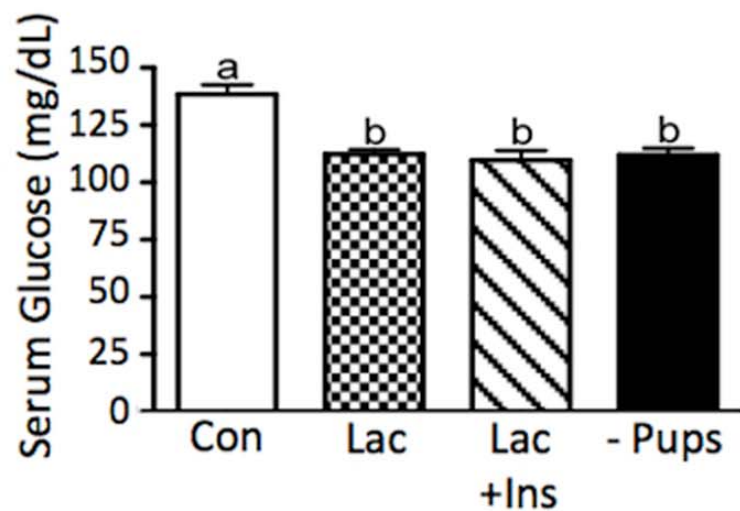

Exp. 2: Leptin replacement

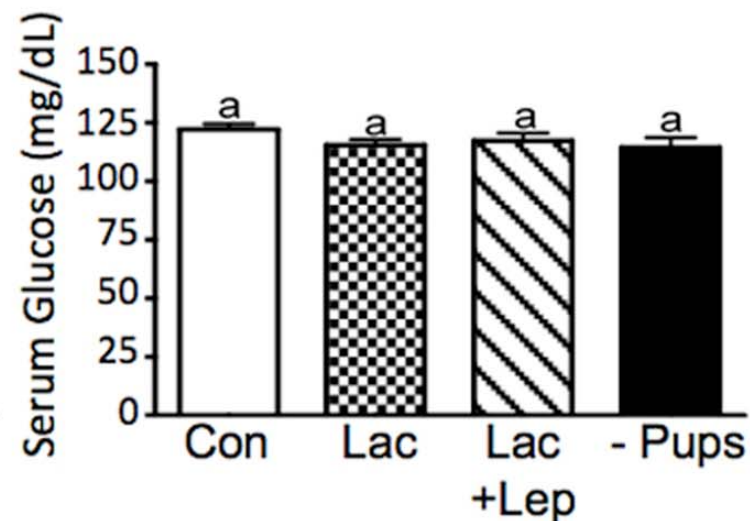

Exp. 3: Insulin + leptin replacement

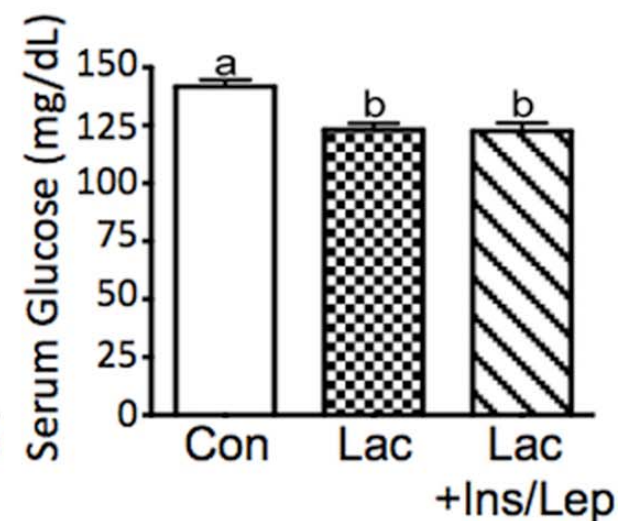

Supplement: en.2009-0190_2.pdf [file en.2009-0190_2.pdf]
